# Supplementary material for: Global Epidemiology and Burden of Schizophrenia: Findings From the Global Burden of Disease Study 2016
Source: Oxford University Press journal article supplement (doi:10.1093/schbul/sby058), 2018-04-27
Supplement: sby058_suppl_supplementary_material.docx [file sby058_suppl_supplementary_material.docx]

Table S1: Summary of schizophrenia data points, GBD 2016

| Location | Prevalence | Standardised mortality ratio | Remission | Incidence | Relative risk (of death) |
| --- | --- | --- | --- | --- | --- |
| Australia | 10 |  |  |  | 3 |
| Barbados |  |  |  | 1 |  |
| Beijing | 2 | 1 | 1 |  |  |
| Bulgaria |  | 1 | 1 |  |  |
| California |  |  |  | 8 |  |
| Canada | 16 | 6 |  | 4 | 1 |
| China | 15 | 3 | 5 |  |  |
| Colombia |  | 1 | 1 |  |  |
| Czech Republic |  | 1 | 1 |  |  |
| Denmark | 30 | 12 |  | 71 |  |
| Dominican Republic | 1 |  |  |  |  |
| East Midlands |  | 1 | 1 | 13 |  |
| Ethiopia | 4 | 6 |  |  |  |
| Federated States of Micronesia | 2 |  |  |  |  |
| Finland |  | 5 | 1 | 2 | 4 |
| France |  | 4 |  |  |  |
| Fujian | 2 |  |  |  |  |
| Germany |  | 2 | 1 |  |  |
| Greater London | 12 |  |  | 2 |  |
| Guangxi | 11 |  |  |  |  |
| Gunma |  | 2 |  |  |  |
| Hawaii |  | 1 | 1 |  |  |
| Hebei | 14 |  |  |  |  |
| Heilongjiang | 1 |  |  |  |  |
| Hong Kong Special Administrative Region of China |  | 1 | 1 |  |  |
| India | 1 | 4 | 1 | 6 |  |
| Indonesia |  | 2 |  |  |  |
| Iran | 1 |  |  |  |  |
| Ireland | 5 | 1 | 1 | 2 | 1 |
| Israel | 2 |  |  |  |  |
| Italy | 16 | 12 |  | 21 |  |
| Jamaica | 1 |  |  | 6 |  |
| Japan | 92 | 3 | 1 | 14 |  |
| Jiangsu | 5 |  |  |  |  |
| Jiangxi | 3 |  |  |  |  |
| Jilin | 2 |  |  |  |  |
| Liaoning | 2 |  |  |  |  |
| Missouri |  | 1 |  |  |  |
| Nagasaki | 10 | 1 | 1 | 14 |  |
| Netherlands | 13 | 1 | 1 | 16 |  |
| Nigeria |  |  |  | 2 |  |
| North West England | 2 |  |  | 3 |  |
| Northern Ireland | 2 |  |  | 2 |  |
| Oceania | 2 |  |  |  |  |
| Punjab, Rural |  |  |  | 2 |  |
| Punjab, Urban |  |  |  | 2 |  |
| Russia |  | 1 | 1 | 2 |  |
| Scotland | 4 |  |  |  |  |
| Shanghai | 2 |  |  |  |  |
| Singapore | 1 |  |  |  |  |
| South West England | 2 | 2 |  |  |  |
| Spain | 6 |  |  | 2 |  |
| Stockholm |  |  |  | 5 |  |
| Suriname |  |  |  | 1 |  |
| Sweden | 49 | 1 |  | 5 | 7 |
| Sweden except Stockholm | 5 |  |  |  |  |
| Taiwan | 3 |  |  |  |  |
| Tamil Nādu, Urban | 6 | 1 | 1 | 2 |  |
| Thailand | 1 |  |  |  |  |
| The Six Minor Territories, Rural |  | 1 |  |  |  |
| The Six Minor Territories, Urban |  | 1 |  |  |  |
| Timor-Leste | 1 |  |  |  |  |
| Trinidad and Tobago |  |  |  | 3 |  |
| United States | 8 | 2 | 1 | 8 |  |
| Uttar Pradesh, Urban |  | 1 |  |  |  |
| Vietnam | 16 |  |  |  |  |
| West Midlands |  | 4 |  |  |  |
| Xinjiang | 2 | 1 |  |  |  |
| Yunnan | 10 |  | 3 |  |  |
| Zhejiang | 14 |  |  |  |  |
| Global | 409 | 87 | 25 | 219 | 16 |

Table S2: Age-standardised prevalence rates and cases by region, country and year

|  | **Prevalent cases (in 1000s)** | | **Age-standardised prevalence (%)** | |
| --- | --- | --- | --- | --- |
| **Location** | **1990** | **2016** | **1990** | **2016** |
| **Global** | **13122.1 (11607.0-14751.9)** | **20883.0 (18496.7-23422.0)** | **0.28 (0.25-0.31)** | **0.28 (0.24-0.31)** |
| **Southeast Asia, East Asia, and Oceania** | **5869.3 (5174.5-6646.2)** | **9109.4 (8074.2-10206.5)** | **0.38 (0.34-0.43)** | **0.38 (0.34-0.43)** |
| **East Asia** | **4855.1 (4280.0-5489.6)** | **7237.9 (6435.4-8087.2)** | **0.42 (0.38-0.47)** | **0.42 (0.38-0.47)** |
| China | 4682.2 (4127.5-5296.0) | 7004.6 (6228.3-7822.6) | 0.42 (0.38-0.47) | 0.42 (0.38-0.48) |
| North Korea | 81.7 (70.8-93.5) | 105.7 (93.2-119.5) | 0.41 (0.36-0.47) | 0.38 (0.33-0.43) |
| Taiwan | 91.2 (78.8-104.9) | 127.6 (112.2-144.1) | 0.45 (0.39-0.51) | 0.44 (0.39-0.51) |
| **Southeast Asia** | **999.9 (872.6-1150.3)** | **1843.8 (1618.6-2095.3)** | **0.26 (0.23-0.30)** | **0.27 (0.24-0.31)** |
| Cambodia | 15.5 (13.4-17.9) | 36.6 (31.8-42.1) | 0.24 (0.21-0.27) | 0.25 (0.22-0.28) |
| Indonesia | 390.2 (340.7-447.6) | 715.9 (627.3-813.9) | 0.26 (0.23-0.29) | 0.27 (0.24-0.31) |
| Laos | 7.2 (6.3-8.3) | 15.1 (13.1-17.4) | 0.24 (0.21-0.27) | 0.25 (0.22-0.29) |
| Malaysia | 42.7 (37.0-49.4) | 93.5 (80.9-107.1) | 0.28 (0.24-0.32) | 0.29 (0.25-0.33) |
| Maldives | 0.4 (0.3-0.5) | 1.0 (0.9-1.2) | 0.27 (0.24-0.31) | 0.28 (0.25-0.32) |
| Mauritius | 2.8 (2.4-3.2) | 4.1 (3.6-4.6) | 0.27 (0.24-0.31) | 0.28 (0.25-0.32) |
| Myanmar | 81.3 (70.5-93.4) | 140.2 (122.6-159.4) | 0.24 (0.21-0.27) | 0.26 (0.22-0.29) |
| Philippines | 124.2 (107.2-143.3) | 251.3 (220.6-285.6) | 0.26 (0.23-0.30) | 0.27 (0.23-0.30) |
| Sri Lanka | 41.8 (36.4-47.8) | 60.2 (53.0-68.5) | 0.27 (0.23-0.30) | 0.28 (0.24-0.32) |
| Seychelles | 0.2 (0.1-0.2) | 0.3 (0.3-0.3) | 0.28 (0.24-0.31) | 0.28 (0.25-0.32) |
| Thailand | 138.8 (120.3-159.2) | 221.2 (195.0-251.6) | 0.26 (0.23-0.30) | 0.28 (0.24-0.31) |
| Timor-Leste | 1.4 (1.2-1.6) | 2.1 (1.9-2.5) | 0.23 (0.20-0.26) | 0.25 (0.22-0.28) |
| Vietnam | 152.1 (132.4-174.6) | 299.7 (263.1-344.0) | 0.28 (0.24-0.32) | 0.29 (0.26-0.33) |
| **Oceania** | **14.3 (12.4-16.4)** | **27.7 (24.2-31.7)** | **0.29 (0.25-0.33)** | **0.28 (0.25-0.32)** |
| American Samoa | 0.1 (0.1-0.1) | 0.2 (0.2-0.3) | 0.33 (0.29-0.37) | 0.32 (0.28-0.37) |
| Federated States of Micronesia | 0.2 (0.2-0.2) | 0.3 (0.2-0.3) | 0.29 (0.26-0.33) | 0.29 (0.25-0.33) |
| Fiji | 1.8 (1.6-2.1) | 2.7 (2.4-3.1) | 0.30 (0.27-0.35) | 0.31 (0.27-0.35) |
| Guam | 0.4 (0.4-0.5) | 0.6 (0.5-0.7) | 0.34 (0.29-0.38) | 0.34 (0.29-0.38) |
| Kiribati | 0.2 (0.1-0.2) | 0.3 (0.2-0.3) | 0.28 (0.25-0.32) | 0.28 (0.24-0.32) |
| Marshall Islands | 0.1 (0.1-0.1) | 0.2 (0.2-0.2) | 0.29 (0.26-0.33) | 0.29 (0.25-0.33) |
| Northern Mariana Islands | 0.2 (0.1-0.2) | 0.5 (0.4-0.5) | 0.34 (0.30-0.39) | 0.33 (0.29-0.37) |
| Papua New Guinea | 8.5 (7.4-9.8) | 18.3 (15.9-21.1) | 0.28 (0.24-0.32) | 0.28 (0.25-0.32) |
| Samoa | 0.4 (0.3-0.4) | 0.5 (0.4-0.5) | 0.30 (0.27-0.34) | 0.30 (0.27-0.35) |
| Solomon Islands | 0.6 (0.5-0.7) | 1.3 (1.1-1.5) | 0.28 (0.25-0.32) | 0.28 (0.24-0.32) |
| Tonga | 0.2 (0.2-0.2) | 0.3 (0.2-0.3) | 0.30 (0.26-0.34) | 0.30 (0.27-0.34) |
| Vanuatu | 0.3 (0.3-0.4) | 0.7 (0.6-0.8) | 0.29 (0.25-0.33) | 0.29 (0.25-0.32) |
| **Central Europe, Eastern Europe, and Central Asia** | **865.9 (752.8-991.4)** | **987.0 (857.8-1123.1)** | **0.20 (0.18-0.23)** | **0.21 (0.18-0.24)** |
| **Central Asia** | **116.1 (101.1-132.7)** | **180.5 (157.8-205.4)** | **0.20 (0.18-0.23)** | **0.20 (0.18-0.23)** |
| Armenia | 7.0 (6.1-8.0) | 7.2 (6.3-8.1) | 0.21 (0.18-0.23) | 0.21 (0.18-0.24) |
| Azerbaijan | 12.8 (11.1-14.7) | 23.0 (20.0-26.1) | 0.21 (0.18-0.23) | 0.21 (0.18-0.24) |
| Georgia | 11.8 (10.4-13.5) | 9.5 (8.3-10.7) | 0.21 (0.18-0.24) | 0.21 (0.18-0.24) |
| Kazakhstan | 31.5 (27.3-36.0) | 38.7 (33.7-44.1) | 0.21 (0.18-0.23) | 0.21 (0.18-0.24) |
| Kyrgyzstan | 7.0 (6.1-8.1) | 10.9 (9.5-12.4) | 0.20 (0.17-0.23) | 0.20 (0.17-0.22) |
| Mongolia | 3.1 (2.7-3.5) | 6.2 (5.4-7.1) | 0.20 (0.17-0.22) | 0.20 (0.18-0.23) |
| Tajikistan | 7.3 (6.4-8.4) | 14.5 (12.6-16.6) | 0.20 (0.17-0.23) | 0.20 (0.17-0.22) |
| Turkmenistan | 5.5 (4.8-6.3) | 11.1 (9.7-12.8) | 0.20 (0.18-0.23) | 0.21 (0.18-0.24) |
| Uzbekistan | 30.0 (26.0-34.5) | 59.3 (51.4-67.6) | 0.20 (0.17-0.22) | 0.20 (0.18-0.23) |
| **Central Europe** | **279.2 (235.7-328.7)** | **302.9 (256.5-354.7)** | **0.21 (0.18-0.25)** | **0.22 (0.18-0.26)** |
| Albania | 6.1 (5.1-7.3) | 6.8 (5.7-8.1) | 0.21 (0.18-0.25) | 0.22 (0.18-0.26) |
| Bosnia and Herzegovina | 9.8 (8.2-11.7) | 10.1 (8.5-12.0) | 0.21 (0.17-0.24) | 0.22 (0.18-0.26) |
| Bulgaria | 21.0 (18.4-23.7) | 19.2 (16.9-21.7) | 0.22 (0.19-0.25) | 0.22 (0.19-0.25) |
| Croatia | 11.8 (9.8-13.9) | 10.9 (9.2-12.8) | 0.22 (0.18-0.26) | 0.22 (0.18-0.26) |
| Czech Republic | 24.4 (21.5-27.8) | 28.4 (24.8-32.5) | 0.22 (0.19-0.25) | 0.22 (0.19-0.25) |
| Hungary | 24.7 (20.7-29.2) | 25.9 (21.8-30.4) | 0.22 (0.18-0.26) | 0.22 (0.18-0.26) |
| Macedonia | 4.4 (3.6-5.3) | 5.3 (4.5-6.4) | 0.22 (0.18-0.26) | 0.22 (0.18-0.26) |
| Montenegro | 1.3 (1.1-1.6) | 1.5 (1.3-1.8) | 0.22 (0.18-0.25) | 0.22 (0.18-0.26) |
| Poland | 85.6 (71.3-102.2) | 102.5 (85.6-120.6) | 0.21 (0.18-0.26) | 0.22 (0.18-0.26) |
| Romania | 51.7 (43.0-61.2) | 50.1 (42.0-59.6) | 0.21 (0.18-0.25) | 0.22 (0.18-0.26) |
| Serbia | 21.7 (18.2-25.8) | 21.9 (18.3-25.9) | 0.21 (0.18-0.25) | 0.22 (0.18-0.26) |
| Slovakia | 11.8 (9.8-14.0) | 14.7 (12.2-17.5) | 0.22 (0.18-0.26) | 0.22 (0.18-0.27) |
| Slovenia | 4.9 (4.1-5.8) | 5.6 (4.7-6.6) | 0.22 (0.18-0.26) | 0.22 (0.19-0.27) |
| **Eastern Europe** | **470.6 (412.5-531.2)** | **503.7 (443.9-567.1)** | **0.20 (0.17-0.22)** | **0.20 (0.18-0.23)** |
| Belarus | 21.5 (18.9-24.4) | 22.9 (19.9-25.8) | 0.20 (0.17-0.22) | 0.20 (0.18-0.23) |
| Estonia | 3.4 (3.0-3.9) | 3.2 (2.8-3.6) | 0.20 (0.18-0.23) | 0.21 (0.18-0.24) |
| Latvia | 5.8 (5.0-6.6) | 4.7 (4.1-5.3) | 0.20 (0.17-0.23) | 0.20 (0.18-0.23) |
| Lithuania | 7.9 (6.9-9.0) | 6.9 (6.1-7.7) | 0.20 (0.18-0.23) | 0.20 (0.18-0.23) |
| Moldova | 8.5 (7.4-9.6) | 9.3 (8.1-10.5) | 0.19 (0.17-0.22) | 0.19 (0.17-0.22) |
| Russia | 313.2 (274.6-355.5) | 350.0 (308.1-395.9) | 0.20 (0.17-0.22) | 0.20 (0.18-0.23) |
| Ukraine | 110.4 (96.8-124.0) | 106.7 (94.1-120.9) | 0.20 (0.17-0.22) | 0.19 (0.17-0.22) |
| **High-income** | **2577.0 (2303.0-2861.5)** | **3285.2 (2946.8-3634.4)** | **0.26 (0.24-0.29)** | **0.27 (0.24-0.30)** |
| **High-income Asia Pacific** | **505.2 (442.9-569.8)** | **591.5 (523.5-665.1)** | **0.27 (0.24-0.31)** | **0.28 (0.24-0.31)** |
| Brunei | 0.6 (0.5-0.7) | 1.2 (1.1-1.4) | 0.27 (0.23-0.30) | 0.26 (0.23-0.30) |
| Japan | 391.0 (343.0-440.5) | 417.3 (370.3-466.4) | 0.28 (0.25-0.32) | 0.28 (0.25-0.32) |
| South Korea | 106.2 (92.0-120.6) | 160.7 (141.6-181.5) | 0.25 (0.22-0.28) | 0.26 (0.23-0.29) |
| Singapore | 7.5 (6.5-8.5) | 12.3 (10.8-13.9) | 0.25 (0.22-0.29) | 0.26 (0.23-0.29) |
| **Australasia** | **71.5 (63.2-79.6)** | **105.9 (94.3-117.2)** | **0.33 (0.29-0.37)** | **0.33 (0.29-0.37)** |
| Australia | 60.6 (53.6-67.2) | 90.5 (80.5-100.2) | 0.34 (0.30-0.37) | 0.33 (0.30-0.37) |
| New Zealand | 10.8 (9.5-12.3) | 15.4 (13.6-17.4) | 0.31 (0.27-0.35) | 0.31 (0.27-0.35) |
| **Western Europe** | **1029.4 (928.6-1136.2)** | **1242.9 (1119.8-1374.0)** | **0.24 (0.22-0.27)** | **0.25 (0.22-0.27)** |
| Andorra | 0.1 (0.1-0.2) | 0.2 (0.2-0.3) | 0.26 (0.21-0.31) | 0.25 (0.20-0.31) |
| Austria | 21.1 (17.2-25.1) | 26.0 (21.6-31.0) | 0.24 (0.20-0.29) | 0.25 (0.20-0.30) |
| Belgium | 27.5 (22.6-32.7) | 32.3 (26.4-38.6) | 0.24 (0.20-0.29) | 0.24 (0.20-0.29) |
| Cyprus | 1.6 (1.3-1.9) | 2.6 (2.1-3.1) | 0.24 (0.20-0.29) | 0.24 (0.20-0.29) |
| Denmark | 13.4 (12.0-15.0) | 16.2 (14.3-18.3) | 0.23 (0.20-0.26) | 0.25 (0.21-0.28) |
| England | 121.5 (106.7-136.5) | 158.8 (139.6-178.2) | 0.23 (0.20-0.26) | 0.25 (0.22-0.29) |
| Finland | 14.6 (13.0-16.2) | 16.1 (14.2-18.0) | 0.26 (0.23-0.28) | 0.25 (0.22-0.28) |
| France | 147.3 (129.9-165.9) | 175.5 (155.2-197.4) | 0.24 (0.21-0.27) | 0.24 (0.21-0.27) |
| Germany | 206.2 (182.0-232.8) | 222.9 (197.2-252.0) | 0.22 (0.20-0.25) | 0.22 (0.19-0.25) |
| Greece | 27.4 (22.5-32.5) | 31.9 (26.5-37.9) | 0.24 (0.20-0.29) | 0.24 (0.20-0.29) |
| Iceland | 0.6 (0.5-0.8) | 0.9 (0.8-1.1) | 0.25 (0.20-0.30) | 0.25 (0.20-0.30) |
| Ireland | 9.1 (8.0-10.4) | 14.7 (12.9-16.7) | 0.27 (0.24-0.31) | 0.28 (0.25-0.32) |
| Israel | 9.0 (7.9-10.3) | 18.2 (16.0-20.7) | 0.23 (0.20-0.26) | 0.23 (0.20-0.26) |
| Italy | 147.5 (139.4-157.1) | 166.3 (151.1-180.0) | 0.23 (0.22-0.24) | 0.23 (0.20-0.24) |
| Luxembourg | 1.1 (0.9-1.3) | 1.8 (1.4-2.1) | 0.25 (0.20-0.30) | 0.25 (0.21-0.30) |
| Malta | 0.9 (0.7-1.1) | 1.2 (1.0-1.5) | 0.24 (0.20-0.29) | 0.25 (0.20-0.30) |
| Netherlands | 61.6 (55.5-67.9) | 71.7 (64.4-80.2) | 0.37 (0.33-0.41) | 0.36 (0.32-0.40) |
| Northern Ireland | 3.8 (3.4-4.3) | 5.2 (4.6-5.8) | 0.24 (0.22-0.27) | 0.25 (0.22-0.28) |
| Norway | 11.5 (9.3-13.7) | 15.1 (12.3-18.0) | 0.25 (0.20-0.30) | 0.25 (0.20-0.30) |
| Portugal | 25.5 (20.9-30.1) | 30.6 (25.4-36.3) | 0.24 (0.19-0.28) | 0.24 (0.20-0.29) |
| Scotland | 12.3 (11.5-13.1) | 14.6 (13.6-15.7) | 0.22 (0.21-0.23) | 0.23 (0.21-0.25) |
| Spain | 110.9 (105.7-116.1) | 153.5 (145.7-160.3) | 0.27 (0.25-0.28) | 0.27 (0.26-0.28) |
| Sweden | 26.8 (24.2-29.5) | 31.3 (28.4-34.3) | 0.28 (0.25-0.31) | 0.27 (0.25-0.30) |
| Switzerland | 19.3 (15.7-23.1) | 25.4 (21.0-30.3) | 0.25 (0.20-0.30) | 0.25 (0.20-0.30) |
| Wales | 7.6 (6.2-9.0) | 8.6 (7.1-10.1) | 0.24 (0.20-0.29) | 0.24 (0.20-0.29) |
| **Southern Latin America** | **86.3 (75.4-98.0)** | **130.1 (113.8-147.0)** | **0.19 (0.17-0.21)** | **0.19 (0.17-0.22)** |
| Argentina | 57.3 (50.1-65.2) | 84.2 (73.8-95.1) | 0.19 (0.17-0.21) | 0.19 (0.17-0.22) |
| Chile | 23.1 (20.2-26.3) | 39.0 (34.1-44.1) | 0.19 (0.17-0.21) | 0.19 (0.17-0.22) |
| Uruguay | 5.8 (5.1-6.6) | 6.9 (6.1-7.9) | 0.19 (0.17-0.21) | 0.19 (0.17-0.22) |
| **High-income North America** | **884.6 (786.8-987.2)** | **1214.7 (1085.1-1346.5)** | **0.30 (0.26-0.33)** | **0.30 (0.27-0.34)** |
| Canada | 90.8 (89.8-92.0) | 128.0 (126.4-129.7) | 0.30 (0.30-0.30) | 0.30 (0.30-0.30) |
| Greenland | 0.2 (0.1-0.2) | 0.2 (0.1-0.2) | 0.29 (0.26-0.33) | 0.30 (0.26-0.34) |
| United States | 793.2 (695.6-896.0) | 1086.1 (957.5-1216.6) | 0.30 (0.26-0.33) | 0.30 (0.26-0.34) |
| **Latin America and Caribbean** | **635.0 (554.2-726.0)** | **1186.5 (1037.6-1343.5)** | **0.20 (0.18-0.23)** | **0.20 (0.18-0.23)** |
| **Caribbean** | **58.2 (51.1-65.8)** | **88.3 (77.7-99.2)** | **0.19 (0.17-0.22)** | **0.19 (0.17-0.21)** |
| Antigua and Barbuda | 0.1 (0.1-0.1) | 0.2 (0.2-0.2) | 0.20 (0.18-0.23) | 0.20 (0.18-0.23) |
| The Bahamas | 0.4 (0.4-0.5) | 0.9 (0.8-1.0) | 0.20 (0.17-0.22) | 0.20 (0.17-0.22) |
| Barbados | 0.6 (0.5-0.6) | 0.7 (0.6-0.8) | 0.22 (0.20-0.25) | 0.22 (0.20-0.25) |
| Belize | 0.2 (0.2-0.3) | 0.6 (0.5-0.7) | 0.19 (0.17-0.21) | 0.19 (0.17-0.22) |
| Bermuda | 0.1 (0.1-0.1) | 0.2 (0.1-0.2) | 0.21 (0.18-0.24) | 0.21 (0.18-0.24) |
| Cuba | 20.7 (18.1-23.6) | 27.3 (24.1-30.9) | 0.20 (0.18-0.23) | 0.20 (0.18-0.23) |
| Dominica | 0.1 (0.1-0.1) | 0.1 (0.1-0.2) | 0.19 (0.17-0.22) | 0.20 (0.17-0.22) |
| Dominican Republic | 10.5 (9.1-12.0) | 19.5 (17.1-22.1) | 0.19 (0.17-0.22) | 0.20 (0.17-0.22) |
| Grenada | 0.1 (0.1-0.2) | 0.2 (0.2-0.2) | 0.19 (0.17-0.21) | 0.19 (0.17-0.22) |
| Guyana | 1.0 (0.9-1.2) | 1.3 (1.2-1.5) | 0.18 (0.16-0.20) | 0.18 (0.16-0.21) |
| Haiti | 8.7 (7.5-9.8) | 15.5 (13.6-17.6) | 0.17 (0.15-0.19) | 0.17 (0.15-0.19) |
| Jamaica | 3.6 (3.2-4.1) | 5.5 (4.9-6.3) | 0.19 (0.17-0.22) | 0.20 (0.17-0.22) |
| Puerto Rico | 6.8 (6.0-7.7) | 8.3 (7.3-9.4) | 0.20 (0.18-0.23) | 0.20 (0.18-0.23) |
| Saint Lucia | 0.2 (0.2-0.2) | 0.4 (0.3-0.4) | 0.19 (0.17-0.22) | 0.19 (0.17-0.22) |
| Saint Vincent and the Grenadines | 0.2 (0.1-0.2) | 0.2 (0.2-0.2) | 0.19 (0.17-0.21) | 0.19 (0.17-0.22) |
| Suriname | 0.6 (0.6-0.7) | 1.0 (0.9-1.1) | 0.18 (0.16-0.20) | 0.19 (0.17-0.21) |
| Trinidad and Tobago | 1.8 (1.6-2.0) | 2.7 (2.4-3.0) | 0.17 (0.15-0.19) | 0.17 (0.16-0.19) |
| Virgin Islands, U.S. | 0.2 (0.2-0.2) | 0.2 (0.2-0.3) | 0.20 (0.18-0.23) | 0.20 (0.18-0.23) |
| **Andean Latin America** | **59.0 (51.5-67.2)** | **113.5 (99.5-128.3)** | **0.20 (0.17-0.22)** | **0.20 (0.18-0.23)** |
| Bolivia | 9.6 (8.4-10.9) | 18.6 (16.3-21.0) | 0.19 (0.17-0.22) | 0.19 (0.17-0.22) |
| Ecuador | 15.7 (13.7-18.0) | 31.5 (27.6-35.9) | 0.20 (0.18-0.23) | 0.20 (0.18-0.23) |
| Peru | 33.7 (29.3-38.4) | 63.5 (55.6-71.9) | 0.20 (0.18-0.23) | 0.20 (0.18-0.23) |
| **Central Latin America** | **256.1 (223.2-293.2)** | **510.4 (446.6-580.3)** | **0.20 (0.18-0.23)** | **0.20 (0.18-0.23)** |
| Colombia | 55.2 (47.9-63.2) | 104.5 (91.6-118.7) | 0.20 (0.18-0.23) | 0.20 (0.18-0.23) |
| Costa Rica | 5.5 (4.8-6.3) | 11.0 (9.6-12.6) | 0.21 (0.18-0.23) | 0.21 (0.18-0.24) |
| El Salvador | 7.5 (6.6-8.5) | 11.4 (10.0-12.8) | 0.19 (0.17-0.22) | 0.20 (0.17-0.22) |
| Guatemala | 11.6 (10.1-13.2) | 25.5 (22.1-29.1) | 0.19 (0.17-0.22) | 0.19 (0.17-0.22) |
| Honduras | 6.1 (5.3-7.0) | 13.8 (12.0-15.7) | 0.19 (0.17-0.22) | 0.19 (0.17-0.22) |
| Mexico | 128.9 (112.2-147.6) | 261.1 (227.8-297.1) | 0.21 (0.18-0.23) | 0.21 (0.18-0.23) |
| Nicaragua | 5.3 (4.6-6.1) | 11.3 (9.9-12.9) | 0.20 (0.17-0.22) | 0.20 (0.17-0.22) |
| Panama | 4.0 (3.5-4.6) | 8.3 (7.3-9.4) | 0.20 (0.18-0.23) | 0.21 (0.18-0.24) |
| Venezuela | 31.9 (27.8-36.7) | 63.6 (55.4-72.8) | 0.21 (0.18-0.23) | 0.21 (0.18-0.24) |
| **Tropical Latin America** | **261.6 (228.3-299.7)** | **474.2 (415.1-536.3)** | **0.20 (0.18-0.23)** | **0.20 (0.18-0.23)** |
| Brazil | 255.4 (222.8-292.4) | 461.9 (404.1-522.1) | 0.20 (0.18-0.23) | 0.20 (0.18-0.23) |
| Paraguay | 6.3 (5.4-7.2) | 12.4 (10.8-14.1) | 0.20 (0.18-0.23) | 0.20 (0.18-0.23) |
| **North Africa and Middle East** | **443.9 (387.6-508.3)** | **1014.7 (881.1-1156.3)** | **0.18 (0.16-0.21)** | **0.19 (0.16-0.21)** |
| **North Africa and Middle East** | **443.9 (387.6-508.3)** | **1014.7 (881.1-1156.3)** | **0.18 (0.16-0.21)** | **0.19 (0.16-0.21)** |
| Afghanistan | 12.1 (10.5-13.8) | 35.8 (30.9-41.0) | 0.16 (0.14-0.18) | 0.16 (0.14-0.18) |
| Algeria | 33.1 (28.7-38.0) | 75.5 (65.4-86.2) | 0.19 (0.17-0.21) | 0.19 (0.17-0.22) |
| Bahrain | 0.9 (0.8-1.1) | 3.3 (2.8-3.8) | 0.20 (0.17-0.23) | 0.20 (0.18-0.23) |
| Egypt | 77.5 (67.6-88.3) | 155.5 (135.2-177.6) | 0.18 (0.16-0.20) | 0.19 (0.16-0.21) |
| Iran | 71.4 (62.1-82.1) | 168.4 (145.0-193.4) | 0.19 (0.17-0.21) | 0.19 (0.17-0.22) |
| Iraq | 19.9 (17.3-22.7) | 51.3 (44.3-58.9) | 0.18 (0.16-0.21) | 0.18 (0.16-0.21) |
| Jordan | 3.8 (3.3-4.4) | 12.5 (10.7-14.2) | 0.19 (0.16-0.21) | 0.19 (0.17-0.21) |
| Kuwait | 3.7 (3.1-4.2) | 9.7 (8.4-11.3) | 0.20 (0.18-0.23) | 0.21 (0.18-0.23) |
| Lebanon | 4.3 (3.8-4.9) | 11.7 (10.2-13.4) | 0.19 (0.17-0.22) | 0.19 (0.17-0.22) |
| Libya | 6.0 (5.2-7.0) | 12.1 (10.5-13.9) | 0.20 (0.17-0.22) | 0.19 (0.17-0.22) |
| Morocco | 33.0 (28.6-38.0) | 63.5 (55.1-72.4) | 0.18 (0.16-0.20) | 0.18 (0.16-0.21) |
| Palestine | 2.4 (2.0-2.7) | 6.6 (5.7-7.5) | 0.18 (0.16-0.21) | 0.19 (0.16-0.21) |
| Oman | 2.6 (2.2-3.0) | 10.7 (9.1-12.3) | 0.20 (0.17-0.22) | 0.20 (0.18-0.23) |
| Qatar | 1.1 (0.9-1.2) | 6.0 (5.1-7.0) | 0.21 (0.18-0.24) | 0.21 (0.18-0.24) |
| Saudi Arabia | 24.2 (20.8-28.2) | 67.7 (58.7-77.6) | 0.20 (0.18-0.23) | 0.20 (0.18-0.23) |
| Sudan | 22.1 (19.2-25.3) | 53.5 (46.2-61.3) | 0.17 (0.15-0.19) | 0.17 (0.15-0.20) |
| Syria | 14.1 (12.2-16.2) | 27.7 (24.0-31.6) | 0.18 (0.16-0.21) | 0.18 (0.16-0.21) |
| Tunisia | 12.2 (10.6-14.0) | 23.3 (20.3-26.4) | 0.19 (0.16-0.21) | 0.19 (0.17-0.22) |
| Turkey | 83.9 (73.3-95.6) | 158.9 (138.6-179.5) | 0.19 (0.17-0.21) | 0.19 (0.17-0.22) |
| United Arab Emirates | 3.8 (3.2-4.4) | 25.5 (21.9-29.3) | 0.21 (0.18-0.24) | 0.21 (0.18-0.23) |
| Yemen | 11.6 (10.0-13.3) | 34.4 (29.7-39.3) | 0.17 (0.15-0.19) | 0.17 (0.15-0.19) |
| **South Asia** | **2112.1 (1849.6-2378.4)** | **3986.1 (3500.1-4490.1)** | **0.25 (0.22-0.28)** | **0.25 (0.22-0.28)** |
| South Asia | 2112.1 (1849.6-2378.4) | 3986.1 (3500.1-4490.1) | 0.25 (0.22-0.28) | 0.25 (0.22-0.28) |
| Bangladesh | 178.6 (155.7-202.2) | 370.9 (322.9-420.4) | 0.24 (0.21-0.27) | 0.24 (0.22-0.28) |
| Bhutan | 0.9 (0.8-1.1) | 1.9 (1.7-2.2) | 0.25 (0.22-0.28) | 0.25 (0.22-0.28) |
| India | 1712.9 (1502.3-1929.4) | 3161.6 (2780.3-3560.7) | 0.25 (0.22-0.28) | 0.25 (0.22-0.28) |
| Nepal | 32.1 (28.1-36.4) | 59.1 (51.7-66.7) | 0.24 (0.21-0.27) | 0.24 (0.21-0.27) |
| Pakistan | 187.4 (164.1-212.7) | 392.5 (342.2-444.0) | 0.25 (0.22-0.28) | 0.25 (0.22-0.28) |
| **Sub-Saharan Africa** | **619.0 (542.6-702.4)** | **1314.1 (1149.0-1491.4)** | **0.19 (0.17-0.21)** | **0.19 (0.17-0.21)** |
| **Central Sub-Saharan Africa** | **65.1 (56.6-74.2)** | **141.6 (123.5-159.9)** | **0.18 (0.16-0.21)** | **0.18 (0.16-0.20)** |
| Angola | 13.5 (11.7-15.4) | 31.9 (27.8-36.6) | 0.19 (0.17-0.21) | 0.20 (0.17-0.22) |
| Central African Republic | 3.6 (3.1-4.1) | 6.3 (5.5-7.2) | 0.17 (0.15-0.19) | 0.17 (0.15-0.19) |
| Congo | 3.1 (2.7-3.5) | 6.6 (5.7-7.4) | 0.19 (0.17-0.21) | 0.19 (0.17-0.22) |
| Democratic Republic of the Congo | 42.9 (37.1-49.0) | 92.5 (80.4-105.0) | 0.18 (0.16-0.21) | 0.18 (0.16-0.20) |
| Equatorial Guinea | 0.5 (0.4-0.6) | 1.4 (1.3-1.6) | 0.18 (0.15-0.20) | 0.21 (0.19-0.24) |
| Gabon | 1.4 (1.3-1.6) | 2.9 (2.5-3.3) | 0.21 (0.18-0.23) | 0.21 (0.18-0.23) |
| **Eastern Sub-Saharan Africa** | **214.5 (187.6-244.1)** | **484.8 (421.8-553.1)** | **0.18 (0.16-0.20)** | **0.18 (0.16-0.21)** |
| Burundi | 6.4 (5.6-7.3) | 13.5 (11.7-15.5) | 0.17 (0.15-0.20) | 0.17 (0.15-0.19) |
| Comoros | 0.5 (0.5-0.6) | 1.2 (1.0-1.3) | 0.19 (0.17-0.22) | 0.19 (0.17-0.21) |
| Djibouti | 0.8 (0.7-0.9) | 1.5 (1.3-1.7) | 0.20 (0.17-0.22) | 0.19 (0.17-0.22) |
| Eritrea | 3.6 (3.1-4.1) | 7.0 (6.0-7.9) | 0.18 (0.16-0.20) | 0.18 (0.16-0.20) |
| Ethiopia | 56.2 (49.2-63.9) | 130.9 (113.6-149.6) | 0.18 (0.15-0.20) | 0.18 (0.16-0.21) |
| Kenya | 26.4 (23.0-30.1) | 65.6 (57.2-74.6) | 0.19 (0.17-0.21) | 0.19 (0.17-0.21) |
| Madagascar | 14.3 (12.5-16.2) | 33.4 (29.2-38.1) | 0.19 (0.16-0.21) | 0.19 (0.16-0.21) |
| Malawi | 10.7 (9.3-12.2) | 19.9 (17.3-22.7) | 0.17 (0.15-0.19) | 0.17 (0.15-0.20) |
| Mozambique | 14.3 (12.6-16.1) | 33.3 (29.0-37.9) | 0.17 (0.15-0.19) | 0.18 (0.16-0.20) |
| Rwanda | 7.8 (6.8-8.9) | 15.9 (13.8-18.2) | 0.18 (0.16-0.20) | 0.18 (0.16-0.20) |
| Somalia | 7.6 (6.6-8.7) | 12.2 (10.6-13.8) | 0.17 (0.15-0.20) | 0.17 (0.15-0.19) |
| South Sudan | 7.6 (6.7-8.7) | 17.1 (14.9-19.4) | 0.19 (0.17-0.21) | 0.19 (0.17-0.21) |
| Tanzania | 30.2 (26.2-34.5) | 68.5 (59.7-78.1) | 0.18 (0.16-0.20) | 0.19 (0.16-0.21) |
| Uganda | 18.7 (16.2-21.3) | 44.2 (38.1-50.6) | 0.17 (0.15-0.19) | 0.18 (0.16-0.20) |
| Zambia | 9.2 (8.0-10.5) | 20.1 (17.4-23.0) | 0.18 (0.16-0.20) | 0.19 (0.16-0.21) |
| **Southern Sub-Saharan Africa** | **78.1 (68.2-88.7)** | **135.4 (118.2-153.9)** | **0.19 (0.17-0.22)** | **0.20 (0.17-0.22)** |
| Botswana | 1.8 (1.5-2.0) | 4.2 (3.6-4.8) | 0.19 (0.17-0.22) | 0.20 (0.18-0.23) |
| Lesotho | 1.8 (1.6-2.1) | 3.0 (2.5-3.4) | 0.17 (0.15-0.19) | 0.18 (0.16-0.20) |
| Namibia | 1.8 (1.6-2.1) | 4.0 (3.4-4.5) | 0.19 (0.17-0.22) | 0.20 (0.17-0.22) |
| South Africa | 59.5 (52.0-67.6) | 102.7 (89.9-116.4) | 0.20 (0.18-0.22) | 0.20 (0.18-0.23) |
| Swaziland | 1.0 (0.9-1.1) | 1.9 (1.6-2.2) | 0.19 (0.16-0.21) | 0.19 (0.17-0.22) |
| Zimbabwe | 12.2 (10.6-14.0) | 19.8 (17.0-22.8) | 0.18 (0.16-0.21) | 0.17 (0.15-0.20) |
| **Western Sub-Saharan Africa** | **261.4 (229.7-296.4)** | **552.3 (484.1-625.4)** | **0.19 (0.17-0.22)** | **0.20 (0.17-0.22)** |
| Benin | 6.3 (5.5-7.2) | 15.5 (13.5-17.7) | 0.19 (0.17-0.22) | 0.19 (0.17-0.22) |
| Burkina Faso | 10.2 (8.9-11.6) | 23.1 (19.9-26.4) | 0.18 (0.16-0.21) | 0.19 (0.16-0.21) |
| Cameroon | 15.4 (13.4-17.5) | 32.2 (28.1-36.7) | 0.19 (0.17-0.22) | 0.19 (0.17-0.21) |
| Cape Verde | 0.4 (0.4-0.5) | 1.0 (0.9-1.1) | 0.20 (0.18-0.23) | 0.21 (0.18-0.24) |
| Chad | 7.1 (6.2-8.1) | 17.0 (14.7-19.5) | 0.19 (0.16-0.21) | 0.19 (0.17-0.21) |
| Cote d'Ivoire | 16.3 (14.2-18.5) | 31.5 (27.4-35.9) | 0.19 (0.17-0.22) | 0.19 (0.17-0.22) |
| The Gambia | 1.2 (1.0-1.3) | 2.6 (2.3-3.0) | 0.19 (0.17-0.22) | 0.19 (0.17-0.22) |
| Ghana | 19.2 (16.7-21.8) | 43.2 (37.8-49.1) | 0.19 (0.17-0.21) | 0.20 (0.17-0.22) |
| Guinea | 8.2 (7.1-9.2) | 17.3 (15.1-19.8) | 0.19 (0.17-0.21) | 0.19 (0.16-0.21) |
| Guinea-Bissau | 1.4 (1.2-1.5) | 2.6 (2.2-2.9) | 0.18 (0.16-0.21) | 0.18 (0.16-0.21) |
| Liberia | 2.7 (2.3-3.0) | 6.2 (5.4-7.0) | 0.19 (0.16-0.21) | 0.18 (0.16-0.21) |
| Mali | 10.1 (8.9-11.5) | 22.0 (19.0-25.1) | 0.18 (0.16-0.21) | 0.19 (0.17-0.21) |
| Mauritania | 2.7 (2.4-3.1) | 6.4 (5.6-7.3) | 0.20 (0.17-0.23) | 0.20 (0.18-0.23) |
| Niger | 9.8 (8.5-11.1) | 23.1 (20.2-26.1) | 0.19 (0.16-0.21) | 0.18 (0.16-0.21) |
| Nigeria | 131.2 (114.5-148.4) | 268.3 (234.7-305.3) | 0.20 (0.18-0.22) | 0.20 (0.18-0.23) |
| Sao Tome and Principe | 0.1 (0.1-0.2) | 0.3 (0.2-0.3) | 0.20 (0.18-0.23) | 0.20 (0.18-0.23) |
| Senegal | 9.3 (8.1-10.5) | 21.0 (18.2-24.0) | 0.19 (0.17-0.22) | 0.19 (0.17-0.22) |
| Sierra Leone | 5.2 (4.6-5.9) | 8.9 (7.8-10.2) | 0.19 (0.16-0.21) | 0.19 (0.17-0.21) |
| Togo | 4.6 (4.0-5.3) | 10.1 (8.8-11.5) | 0.19 (0.16-0.21) | 0.19 (0.16-0.21) |

Table S3: YLD rates and number by region, country for 2016

| **Location** | **YLDs (in 1,000s)** | **Age-standardised rate per100,000** |
| --- | --- | --- |
| **Global** | **13413.6 (9857.4-16705.2)** | **177.2 (130.5-220.3)** |
| **Southeast Asia, East Asia, and Oceania** | **5924.4 (4325.7-7393.1)** | **246.9 (180.0-307.4)** |
| **East Asia** | **4712.0 (3450.6-5859.4)** | **276.3 (201.5-343.6)** |
| China | 4560.9 (3337.9-5670.1) | 276.6 (201.6-343.7) |
| North Korea | 68.5 (50.0-86.5) | 246.3 (179.5-309.8) |
| Taiwan | 82.6 (60.5-103.4) | 289.0 (210.2-362.5) |
| **Southeast Asia** | **1194.6 (866.0-1502.4)** | **176.1 (128.5-220.8)** |
| Cambodia | 23.7 (17.1-29.9) | 159.6 (116.3-198.8) |
| Indonesia | 463.4 (337.2-584.0) | 173.9 (127.0-218.5) |
| Laos | 9.8 (7.0-12.5) | 163.7 (119.1-205.8) |
| Malaysia | 60.8 (43.5-76.8) | 186.8 (134.2-234.2) |
| Maldives | 0.7 (0.5-0.9) | 181.0 (130.2-227.9) |
| Mauritius | 2.6 (1.9-3.3) | 181.8 (131.7-228.6) |
| Myanmar | 90.7 (66.2-114.6) | 164.2 (120.1-206.5) |
| Philippines | 162.7 (116.3-207.5) | 171.4 (123.7-217.1) |
| Sri Lanka | 38.8 (28.2-48.9) | 177.9 (129.4-224.3) |
| Seychelles | 0.2 (0.1-0.2) | 183.9 (134.4-231.8) |
| Thailand | 142.9 (104.4-180.0) | 178.9 (129.1-226.1) |
| Timor-Leste | 1.4 (1.0-1.7) | 158.1 (114.9-198.0) |
| Vietnam | 195.4 (139.2-248.2) | 189.2 (136.4-239.8) |
| **Oceania** | **17.7 (12.7-22.3)** | **180.4 (132.1-225.7)** |
| American Samoa | 0.2 (0.1-0.2) | 203.4 (151.0-254.1) |
| Federated States of Micronesia | 0.2 (0.1-0.2) | 183.7 (133.3-231.3) |
| Fiji | 1.7 (1.3-2.2) | 193.8 (140.0-243.9) |
| Guam | 0.4 (0.3-0.5) | 215.7 (158.0-268.6) |
| Kiribati | 0.2 (0.1-0.2) | 175.5 (129.1-220.0) |
| Marshall Islands | 0.1 (0.1-0.1) | 182.9 (133.5-229.3) |
| Northern Mariana Islands | 0.3 (0.2-0.4) | 209.4 (150.4-262.8) |
| Papua New Guinea | 11.7 (8.4-14.7) | 176.2 (128.0-220.0) |
| Samoa | 0.3 (0.2-0.4) | 194.7 (142.0-244.5) |
| Solomon Islands | 0.8 (0.6-1.1) | 176.1 (127.4-220.7) |
| Tonga | 0.2 (0.1-0.2) | 191.6 (139.6-240.6) |
| Vanuatu | 0.4 (0.3-0.5) | 181.6 (133.1-228.2) |
| **Central Europe, Eastern Europe, and Central Asia** | **626.7 (461.6-778.4)** | **131.5 (96.1-163.9)** |
| **Central Asia** | **116.2 (85.1-145.8)** | **131.2 (96.2-163.8)** |
| Armenia | 4.6 (3.3-5.8) | 134.5 (96.8-168.8) |
| Azerbaijan | 14.8 (10.6-18.6) | 135.8 (97.9-170.6) |
| Georgia | 6.1 (4.5-7.6) | 134.3 (98.9-169.8) |
| Kazakhstan | 24.8 (17.9-31.1) | 134.1 (97.4-168.0) |
| Kyrgyzstan | 7.1 (5.1-8.9) | 125.4 (91.9-157.5) |
| Mongolia | 4.0 (2.9-5.1) | 129.4 (95.9-164.2) |
| Tajikistan | 9.4 (6.8-12.0) | 126.2 (92.2-159.5) |
| Turkmenistan | 7.2 (5.2-9.1) | 133.6 (96.6-167.6) |
| Uzbekistan | 38.3 (27.8-48.1) | 128.7 (94.3-160.6) |
| **Central Europe** | **191.9 (140.1-242.2)** | **140.1 (101.6-178.1)** |
| Albania | 4.3 (3.1-5.6) | 139.5 (99.7-179.2) |
| Bosnia and Herzegovina | 6.4 (4.6-8.2) | 138.1 (98.8-177.3) |
| Bulgaria | 12.1 (8.9-15.1) | 139.2 (101.5-174.3) |
| Croatia | 6.9 (5.0-8.8) | 141.4 (101.3-181.1) |
| Czech Republic | 17.9 (13.2-22.3) | 140.8 (102.5-177.4) |
| Hungary | 16.4 (11.8-20.8) | 139.9 (99.0-180.1) |
| Macedonia | 3.4 (2.5-4.4) | 139.7 (100.6-180.9) |
| Montenegro | 1.0 (0.7-1.3) | 139.0 (100.7-180.0) |
| Poland | 65.1 (47.6-83.1) | 141.0 (102.2-181.3) |
| Romania | 31.7 (22.7-41.0) | 138.7 (98.2-181.3) |
| Serbia | 13.9 (9.9-17.8) | 138.2 (98.1-179.8) |
| Slovakia | 9.4 (6.7-12.0) | 142.0 (100.9-182.6) |
| Slovenia | 3.5 (2.5-4.5) | 142.9 (101.0-183.3) |
| **Eastern Europe** | **318.5 (235.3-397.1)** | **126.9 (93.1-158.8)** |
| Belarus | 14.5 (10.5-18.1) | 128.0 (93.1-160.3) |
| Estonia | 2.0 (1.5-2.5) | 131.7 (96.5-165.7) |
| Latvia | 3.0 (2.2-3.7) | 129.5 (95.7-161.0) |
| Lithuania | 4.3 (3.2-5.4) | 130.3 (94.7-164.1) |
| Moldova | 6.0 (4.4-7.4) | 121.9 (89.8-152.7) |
| Russia | 221.1 (162.5-276.1) | 127.7 (93.2-160.6) |
| Ukraine | 67.7 (50.4-84.6) | 124.0 (91.5-156.4) |
| **High-income** | **2083.0 (1556.6-2546.1)** | **171.8 (128.5-211.1)** |
| **High-income Asia Pacific** | **377.2 (280.8-467.5)** | **177.1 (130.4-221.1)** |
| Brunei | 0.8 (0.6-1.0) | 168.4 (123.7-211.0) |
| Japan | 265.4 (197.4-327.3) | 182.7 (134.1-227.8) |
| South Korea | 103.0 (76.6-128.6) | 165.4 (121.7-207.4) |
| Singapore | 8.0 (5.9-10.0) | 167.7 (122.4-210.4) |
| **Australasia** | **67.5 (50.6-82.9)** | **211.2 (157.0-260.0)** |
| Australia | 57.7 (43.2-71.0) | 213.6 (158.1-262.8) |
| New Zealand | 9.8 (7.3-12.3) | 198.2 (145.7-248.2) |
| **Western Europe** | **787.9 (597.9-959.5)** | **157.3 (118.5-193.6)** |
| Andorra | 0.2 (0.1-0.2) | 160.5 (112.9-210.2) |
| Austria | 16.5 (11.9-21.0) | 157.5 (112.8-203.2) |
| Belgium | 20.4 (14.7-26.8) | 155.9 (110.7-203.7) |
| Cyprus | 1.6 (1.2-2.1) | 155.4 (111.1-202.5) |
| Denmark | 10.2 (7.6-12.6) | 155.6 (115.8-193.5) |
| England | 100.5 (75.3-123.8) | 161.5 (119.9-200.1) |
| Finland | 10.1 (7.5-12.4) | 159.5 (117.6-196.0) |
| France | 111.5 (83.0-139.3) | 153.4 (114.0-193.5) |
| Germany | 140.2 (104.6-173.2) | 141.1 (105.1-175.7) |
| Greece | 20.3 (14.6-26.2) | 155.8 (111.8-204.5) |
| Iceland | 0.6 (0.4-0.8) | 159.1 (111.5-208.5) |
| Ireland | 9.3 (6.9-11.6) | 181.0 (132.7-226.6) |
| Israel | 11.7 (8.6-14.6) | 147.1 (108.3-183.8) |
| Italy | 105.7 (79.0-126.9) | 145.1 (108.0-174.2) |
| Luxembourg | 1.1 (0.8-1.4) | 160.4 (113.4-206.9) |
| Malta | 0.8 (0.6-1.0) | 158.1 (112.8-205.0) |
| Netherlands | 45.3 (34.2-56.2) | 226.9 (169.0-281.9) |
| Northern Ireland | 3.3 (2.4-4.1) | 157.7 (116.7-194.8) |
| Norway | 9.7 (6.8-12.4) | 160.6 (114.8-207.8) |
| Portugal | 19.4 (13.9-25.0) | 153.0 (108.4-198.8) |
| Scotland | 9.2 (7.1-11.2) | 146.7 (111.2-178.5) |
| Spain | 98.3 (74.5-118.3) | 174.2 (131.1-209.3) |
| Sweden | 19.7 (15.0-24.1) | 174.9 (132.7-215.2) |
| Switzerland | 16.1 (11.5-21.1) | 159.0 (113.4-208.4) |
| Wales | 5.4 (3.9-6.9) | 154.6 (110.0-198.5) |
| **Southern Latin America** | **83.3 (62.1-104.1)** | **122.5 (91.3-153.1)** |
| Argentina | 54.0 (40.0-67.9) | 122.1 (90.6-153.5) |
| Chile | 24.9 (18.1-31.2) | 123.4 (89.4-154.7) |
| Uruguay | 4.4 (3.2-5.5) | 122.6 (88.9-152.7) |
| **High-income North America** | **767.1 (569.8-943.2)** | **191.5 (141.2-236.4)** |
| Canada | 81.6 (62.1-97.6) | 191.8 (145.3-229.2) |
| Greenland | 0.1 (0.1-0.1) | 189.3 (138.8-237.5) |
| United States | 685.1 (503.1-849.0) | 191.5 (139.1-237.6) |
| **Latin America and Caribbean** | **765.7 (564.3-951.9)** | **130.9 (97.1-162.6)** |
| **Caribbean** | **56.7 (42.0-70.6)** | **122.6 (90.8-152.6)** |
| Antigua and Barbuda | 0.1 (0.1-0.2) | 129.7 (93.9-163.2) |
| The Bahamas | 0.6 (0.4-0.7) | 126.7 (91.2-159.3) |
| Barbados | 0.5 (0.3-0.6) | 142.2 (103.8-176.2) |
| Belize | 0.4 (0.3-0.5) | 122.1 (90.2-154.1) |
| Bermuda | 0.1 (0.1-0.1) | 135.8 (98.9-170.6) |
| Cuba | 17.5 (12.8-22.1) | 129.5 (94.8-163.0) |
| Dominica | 0.1 (0.1-0.1) | 126.0 (91.1-158.2) |
| Dominican Republic | 12.6 (9.3-15.9) | 126.5 (93.4-158.4) |
| Grenada | 0.1 (0.1-0.2) | 124.0 (91.1-154.9) |
| Guyana | 0.8 (0.6-1.1) | 116.7 (85.3-146.6) |
| Haiti | 9.9 (7.2-12.6) | 106.2 (77.3-133.7) |
| Jamaica | 3.5 (2.6-4.4) | 125.0 (92.0-155.9) |
| Puerto Rico | 5.3 (3.9-6.6) | 130.7 (95.2-163.4) |
| Saint Lucia | 0.2 (0.2-0.3) | 124.5 (91.2-154.8) |
| Saint Vincent and the Grenadines | 0.1 (0.1-0.2) | 123.4 (91.3-155.1) |
| Suriname | 0.7 (0.5-0.8) | 118.1 (87.5-145.0) |
| Trinidad and Tobago | 1.7 (1.3-2.1) | 109.0 (80.9-136.2) |
| Virgin Islands, U.S. | 0.2 (0.1-0.2) | 131.2 (95.8-164.6) |
| **Andean Latin America** | **73.6 (53.5-92.0)** | **130.5 (95.5-162.5)** |
| Bolivia | 12.0 (8.7-14.9) | 124.8 (92.2-154.9) |
| Ecuador | 20.4 (14.8-25.7) | 130.6 (94.7-163.2) |
| Peru | 41.2 (30.1-52.0) | 132.2 (96.7-166.2) |
| **Central Latin America** | **331.1 (243.9-411.0)** | **132.3 (97.9-164.1)** |
| Colombia | 68.1 (50.4-84.9) | 132.5 (98.1-165.3) |
| Costa Rica | 7.1 (5.2-8.9) | 136.7 (99.1-170.9) |
| El Salvador | 7.4 (5.4-9.3) | 126.3 (92.4-158.1) |
| Guatemala | 16.5 (11.9-20.7) | 123.6 (91.0-154.6) |
| Honduras | 9.0 (6.5-11.4) | 124.3 (91.8-156.7) |
| Mexico | 169.1 (124.6-210.2) | 133.5 (98.8-165.7) |
| Nicaragua | 7.4 (5.4-9.4) | 128.2 (94.1-161.7) |
| Panama | 5.4 (3.9-6.8) | 135.8 (98.8-169.1) |
| Venezuela | 41.3 (30.3-52.2) | 133.1 (97.9-167.6) |
| **Tropical Latin America** | **304.4 (224.2-378.7)** | **131.2 (96.7-162.9)** |
| Brazil | 296.4 (218.4-368.7) | 131.2 (96.7-163.0) |
| Paraguay | 8.0 (5.8-10.0) | 129.6 (95.1-161.4) |
| **North Africa and Middle East** | **643.1 (475.9-804.3)** | **118.3 (88.5-146.7)** |
| **North Africa and Middle East** | **643.1 (475.9-804.3)** | **118.3 (88.5-146.7)** |
| Afghanistan | 22.3 (16.1-28.3) | 96.5 (70.7-120.6) |
| Algeria | 48.1 (35.3-60.8) | 120.1 (89.2-151.6) |
| Bahrain | 2.1 (1.5-2.7) | 127.1 (92.9-158.7) |
| Egypt | 98.7 (71.4-124.6) | 117.3 (85.7-146.2) |
| Iran | 106.5 (76.9-135.6) | 121.1 (89.3-152.8) |
| Iraq | 32.1 (23.5-40.7) | 113.2 (83.4-141.6) |
| Jordan | 7.9 (5.8-10.0) | 119.0 (88.4-148.7) |
| Kuwait | 6.2 (4.5-8.0) | 130.6 (96.4-165.3) |
| Lebanon | 7.4 (5.4-9.3) | 121.2 (89.4-152.0) |
| Libya | 7.7 (5.6-9.7) | 120.8 (88.5-151.2) |
| Morocco | 40.0 (28.9-50.1) | 115.0 (83.3-144.0) |
| Palestine | 4.2 (3.1-5.3) | 116.3 (86.3-145.0) |
| Oman | 6.9 (5.0-8.8) | 127.0 (93.8-159.8) |
| Qatar | 3.9 (2.8-5.1) | 133.2 (98.6-168.5) |
| Saudi Arabia | 43.3 (31.8-54.3) | 128.8 (94.6-159.7) |
| Sudan | 33.7 (24.9-42.9) | 108.2 (80.9-136.5) |
| Syria | 17.6 (12.8-22.0) | 116.6 (85.9-143.9) |
| Tunisia | 14.8 (10.8-18.6) | 120.7 (88.4-150.6) |
| Turkey | 100.9 (74.5-128.0) | 122.5 (90.4-155.2) |
| United Arab Emirates | 16.4 (12.0-20.9) | 130.0 (97.4-164.0) |
| Yemen | 21.5 (15.6-27.2) | 106.1 (78.1-132.0) |
| **South Asia** | **2528.7 (1835.3-3158.5)** | **156.5 (115.0-194.0)** |
| **South Asia** | **2528.7 (1835.3-3158.5)** | **156.5 (115.0-194.0)** |
| Bangladesh | 237.3 (171.6-300.4) | 154.8 (113.1-194.3) |
| Bhutan | 1.2 (0.9-1.6) | 159.9 (117.5-199.6) |
| India | 2001.9 (1460.3-2499.0) | 156.9 (115.6-194.3) |
| Nepal | 37.6 (27.2-47.4) | 151.4 (110.5-189.4) |
| Pakistan | 250.6 (180.9-314.9) | 156.2 (115.1-194.3) |
| **Sub-Saharan Africa** | **842.1 (608.3-1052.6)** | **120.2 (89.0-148.3)** |
| **Central Sub-Saharan Africa** | **89.9 (65.2-114.2)** | **113.8 (84.7-142.3)** |
| Angola | 20.4 (14.8-25.7) | 123.8 (92.4-154.2) |
| Central African Republic | 4.0 (2.9-5.1) | 103.7 (76.2-130.4) |
| Congo | 4.2 (3.0-5.3) | 120.6 (88.0-150.1) |
| Democratic Republic of the Congo | 58.6 (42.6-74.8) | 110.3 (81.3-139.2) |
| Equatorial Guinea | 0.9 (0.7-1.2) | 133.7 (97.4-167.5) |
| Gabon | 1.8 (1.3-2.3) | 129.5 (95.2-161.2) |
| **Eastern Sub-Saharan Africa** | **312.0 (226.2-391.4)** | **116.0 (85.3-143.4)** |
| Burundi | 8.8 (6.3-11.2) | 110.0 (80.9-138.8) |
| Comoros | 0.7 (0.5-1.0) | 121.1 (88.8-151.2) |
| Djibouti | 1.0 (0.7-1.3) | 123.9 (91.2-154.7) |
| Eritrea | 4.5 (3.3-5.8) | 115.3 (85.7-145.8) |
| Ethiopia | 84.6 (61.3-107.4) | 115.8 (85.1-145.1) |
| Kenya | 42.3 (30.5-52.9) | 121.3 (89.5-150.2) |
| Madagascar | 21.6 (15.2-27.2) | 118.3 (85.4-147.7) |
| Malawi | 12.8 (9.2-16.3) | 109.2 (80.4-135.6) |
| Mozambique | 21.2 (15.5-26.7) | 110.9 (83.1-138.6) |
| Rwanda | 10.2 (7.4-13.0) | 114.7 (84.0-143.3) |
| Somalia | 7.9 (5.6-10.0) | 109.4 (79.7-137.2) |
| South Sudan | 10.9 (7.9-13.7) | 118.7 (87.4-147.6) |
| Tanzania | 44.2 (32.1-56.0) | 118.2 (86.9-147.7) |
| Uganda | 28.3 (20.5-35.9) | 113.5 (83.5-141.5) |
| Zambia | 12.8 (9.2-16.3) | 117.2 (87.2-145.0) |
| **Southern Sub-Saharan Africa** | **85.7 (62.5-106.7)** | **123.3 (91.6-152.3)** |
| Botswana | 2.6 (1.9-3.3) | 125.7 (94.2-156.1) |
| Lesotho | 1.9 (1.3-2.3) | 110.5 (82.1-136.9) |
| Namibia | 2.5 (1.8-3.2) | 124.5 (91.9-154.7) |
| South Africa | 64.8 (47.6-80.6) | 126.2 (94.2-156.0) |
| Swaziland | 1.2 (0.8-1.5) | 119.1 (87.6-148.3) |
| Zimbabwe | 12.7 (9.1-16.1) | 110.7 (81.9-138.7) |
| **Western Sub-Saharan Africa** | **354.5 (255.7-443.8)** | **125.1 (92.4-154.8)** |
| Benin | 9.9 (7.2-12.5) | 121.6 (89.4-151.2) |
| Burkina Faso | 14.9 (10.8-18.7) | 118.5 (87.2-146.7) |
| Cameroon | 20.6 (14.9-26.0) | 120.7 (88.3-149.7) |
| Cape Verde | 0.6 (0.5-0.8) | 134.2 (97.6-168.4) |
| Chad | 10.8 (7.9-13.9) | 119.2 (88.9-149.2) |
| Cote d'Ivoire | 20.1 (14.5-25.3) | 120.6 (88.4-149.9) |
| The Gambia | 1.7 (1.2-2.1) | 122.1 (89.1-152.4) |
| Ghana | 27.9 (20.3-35.3) | 125.5 (92.4-157.2) |
| Guinea | 11.1 (8.0-14.1) | 118.3 (87.0-148.0) |
| Guinea-Bissau | 1.6 (1.2-2.1) | 115.4 (84.7-144.2) |
| Liberia | 3.9 (2.8-4.9) | 114.3 (84.3-142.9) |
| Mali | 14.1 (10.3-17.7) | 120.7 (89.6-149.3) |
| Mauritania | 4.2 (3.0-5.3) | 128.8 (93.6-160.8) |
| Niger | 14.9 (10.8-18.7) | 117.8 (87.4-146.3) |
| Nigeria | 172.2 (123.1-215.1) | 129.9 (95.2-162.2) |
| Sao Tome and Principe | 0.2 (0.1-0.2) | 128.1 (95.0-160.5) |
| Senegal | 13.6 (9.8-17.4) | 123.7 (91.9-156.5) |
| Sierra Leone | 5.7 (4.1-7.2) | 119.2 (87.5-149.7) |
| Togo | 6.5 (4.7-8.2) | 118.1 (87.1-147.3) |
